# Supplementary material
Source: Springer Nature journal article supplement (https://www.springermedizin.de/resource/supplementary/12889_2011_3301_MOESM3_ESM.pdf/9488644)
Supplement: MOESM3 [file 9488644]

**46,131** files contributed

```
graph TD; A[46,131 files contributed] --> B[298 (0.6%) duplicate files removed]; B --> C[419 (0.9%) files removed that were missing age and/or gender]; C --> D[5 (0.01%) corrupt files removed]; D --> E[219 (0.5%) files with insufficient data points not included]; E --> F[Final database=45,190]; F --> G[556 (1.2%) spurious files]; G --> H[180 (0.4%) temporally shifted files]; H --> I[Final 'viable' database=44,454];
```

298 (0.6%) duplicate files removed

419 (0.9%) files removed that were missing age and/or gender

5 (0.01%) corrupt files removed

219 (0.5%) files with insufficient data points not included

**Final database=45,190**

556 (1.2%) spurious files

180 (0.4%) temporally shifted files

**Final 'viable' database=44,454**
